# Supplementary material for: UPLC-MS/MS profiling, antioxidant and anti-inflammatory activities, and potential health benefits prediction of phenolic compounds in hazel leaf
Source: Frontiers journal article supplement (doi:10.3389/fnut.2023.1092071), 2023-02-01
Supplement: Data_Sheet_1.PDF [file Data_Sheet_1.PDF]

## Supplementary Material

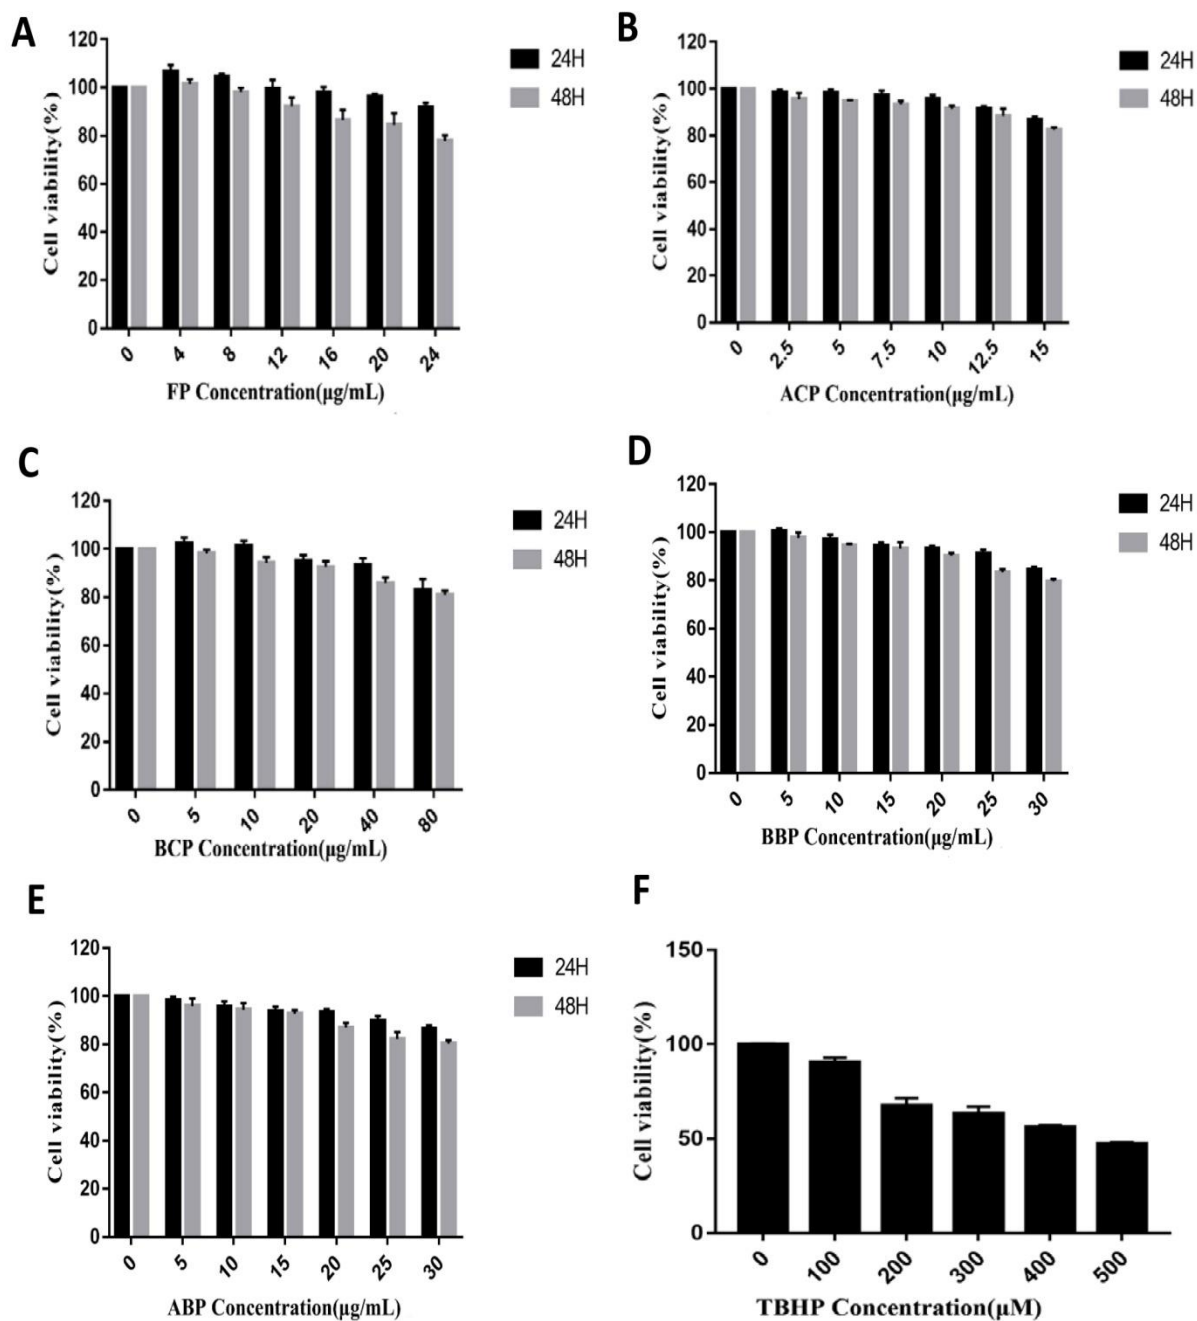

**Figure S1** Evaluation of HUVEC viability using MTT assay after exposure to different concentrations of phenolics for 24 h or 48h and different concentrations of TBHP for 24 h, FP (A), ACP (B), BCP (C), BBP (D), ABP (E), TBHP (F).

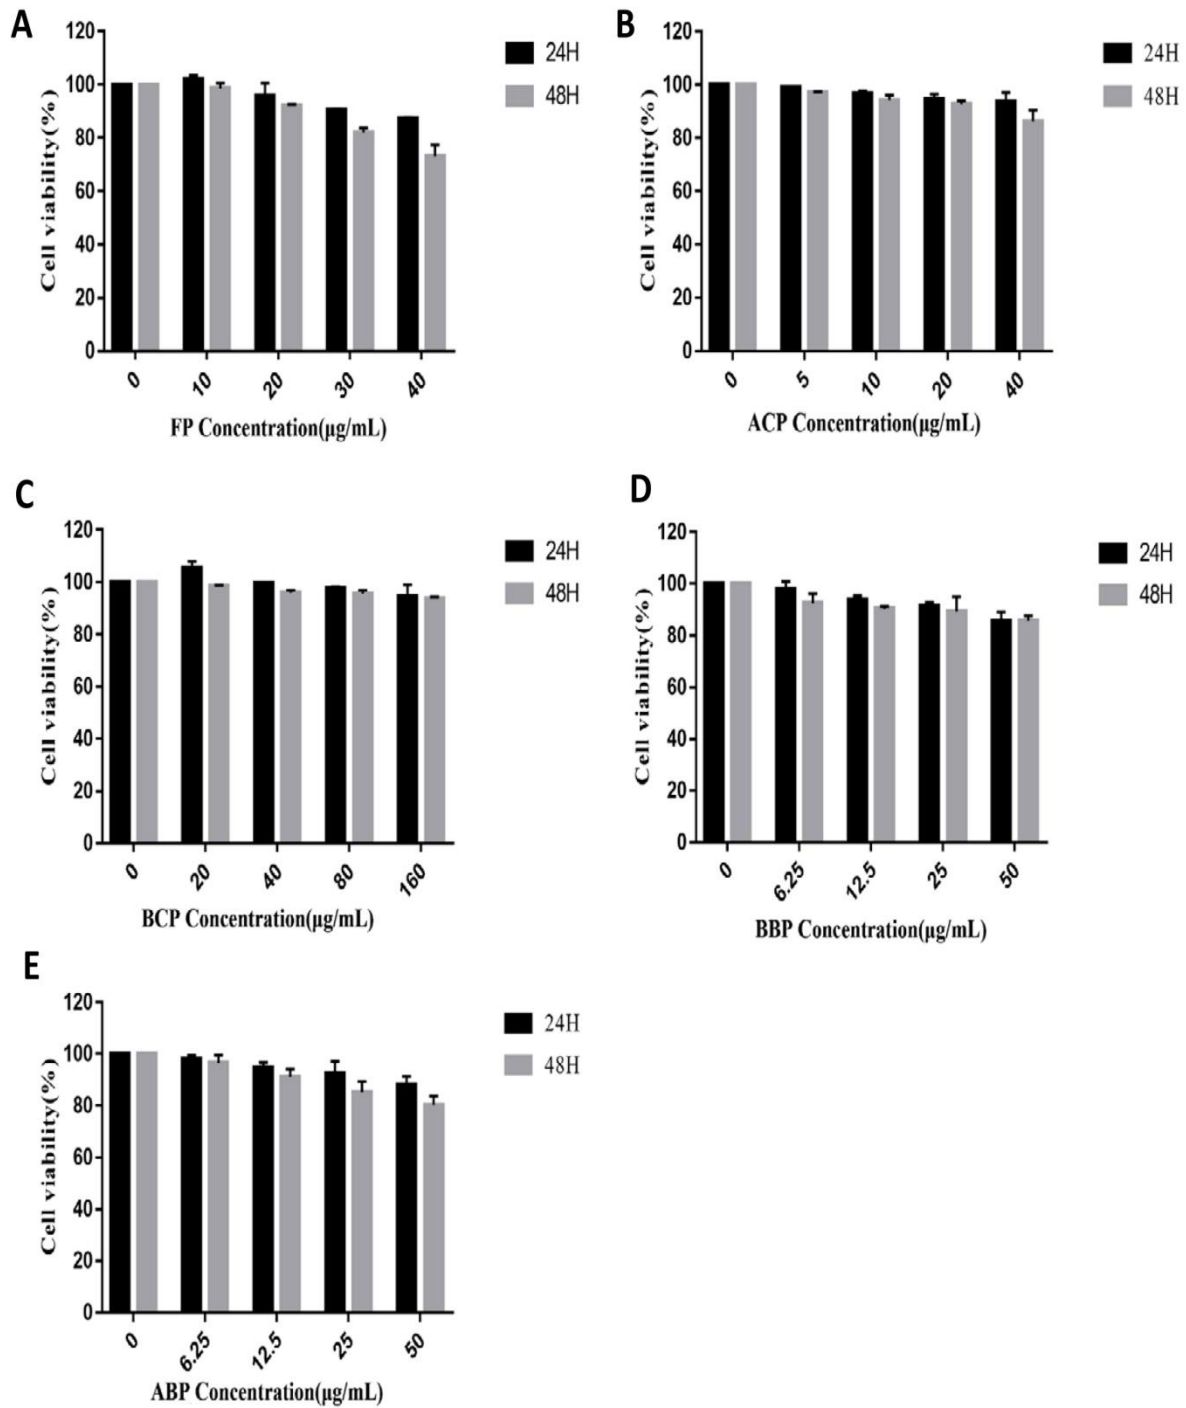

**Figure S2** Evaluation of RAW264.7 viability using MTT assay after exposure to different concentrations of phenolics for 24 h or 48h, FP (A), ACP (B), BCP (C), BBP (D), ABP (E).
